# Supplementary figures and images for: De Novo Donor‐Specific HLA Antibody Formation in Two Patients With Crigler‐Najjar Syndrome Type I Following Human Hepatocyte Transplantation With Partial Hepatectomy Preconditioning
Source: PubMed Central journal article supplement — Am J Transplant. 2015 Nov 2;16(3):1021–30. doi: 10.1111/ajt.13487 (PMC5061095; doi:10.1111/ajt.13487), 2015-11-02

**Fig. S1**

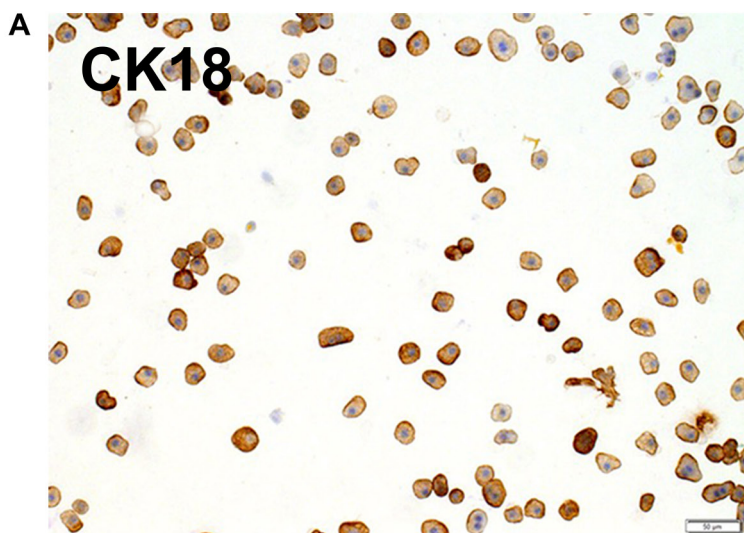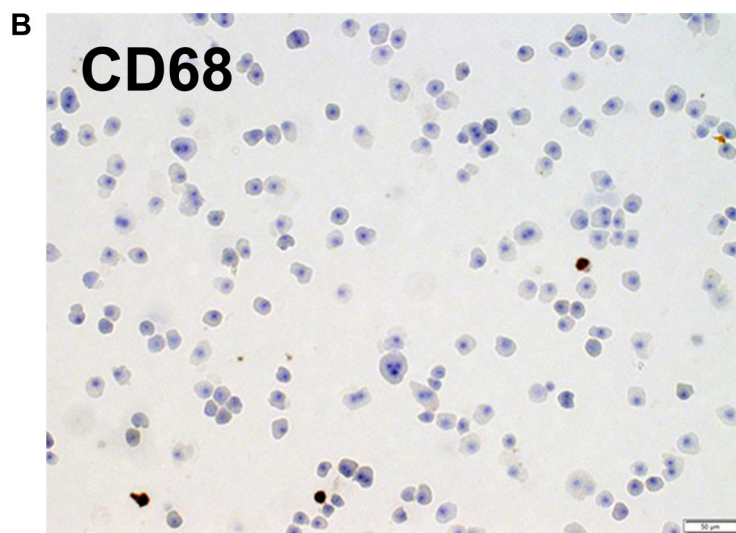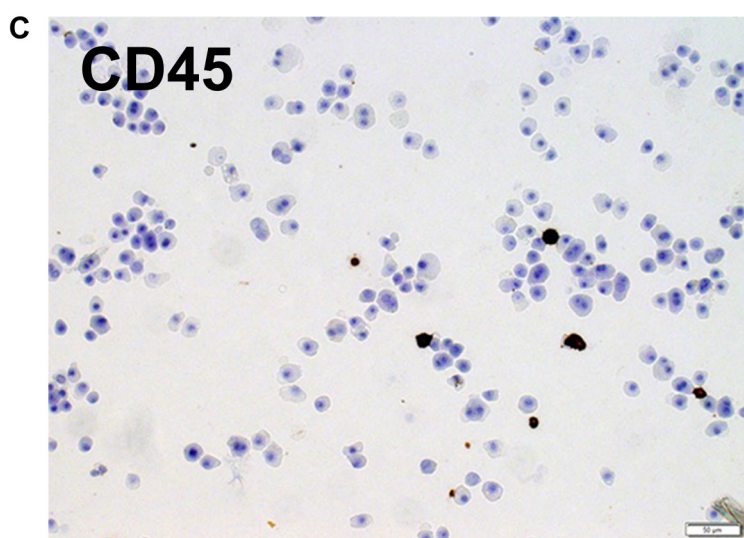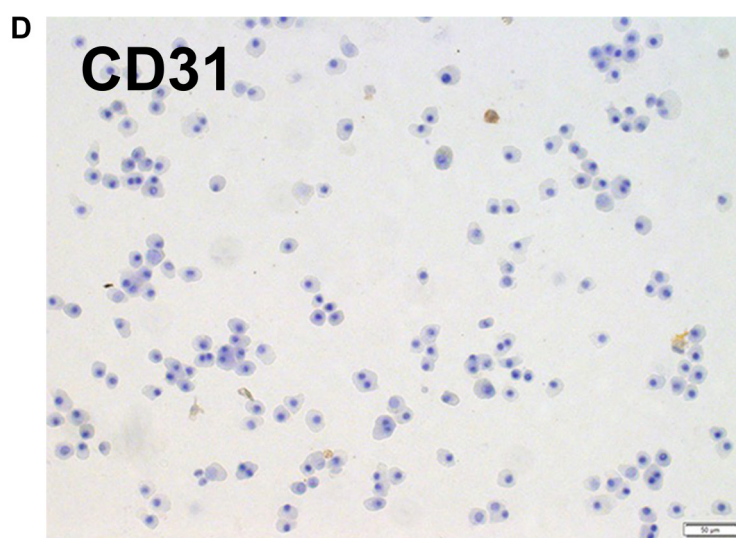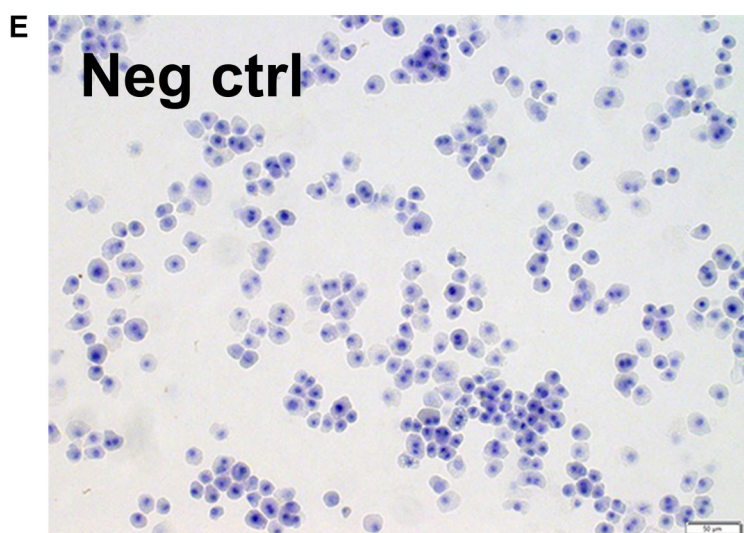

**F**

|             |                     |
|-------------|---------------------|
| <b>CK18</b> | <b>97.6% ± 0.3%</b> |
| <b>CD68</b> | <b>3.1% ± 0.5%</b>  |
| <b>CD45</b> | <b>3.6% ± 0.4%</b>  |
| <b>CD31</b> | <b>1.6% ± 0.37%</b> |



**Fig. S2**

**PRE**

**POST**

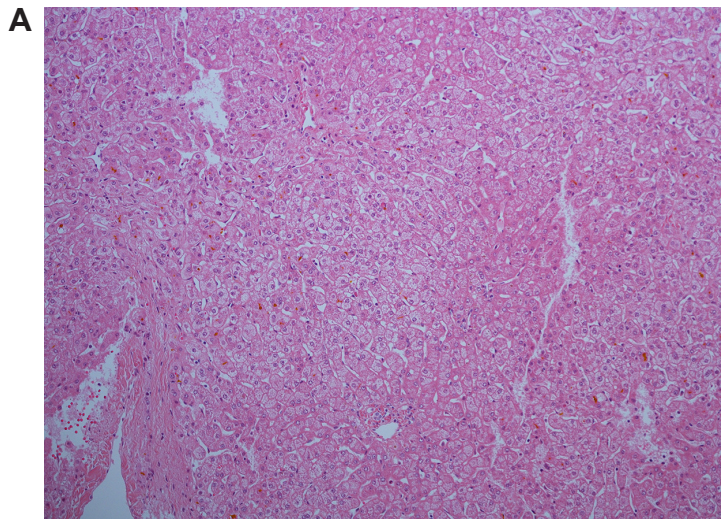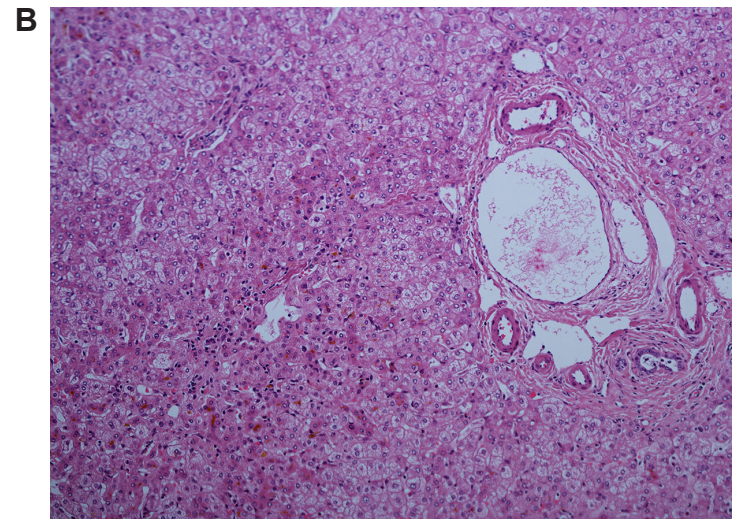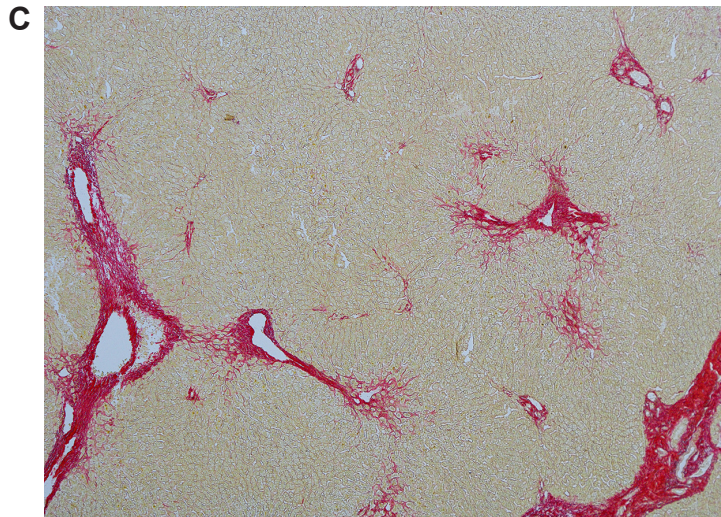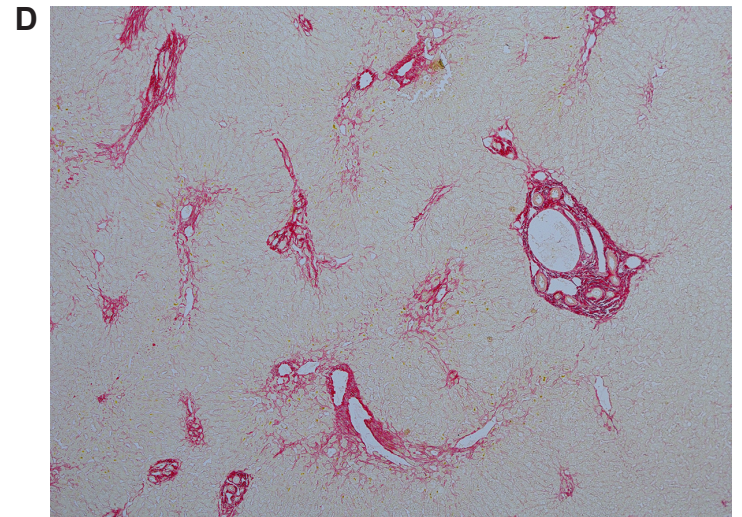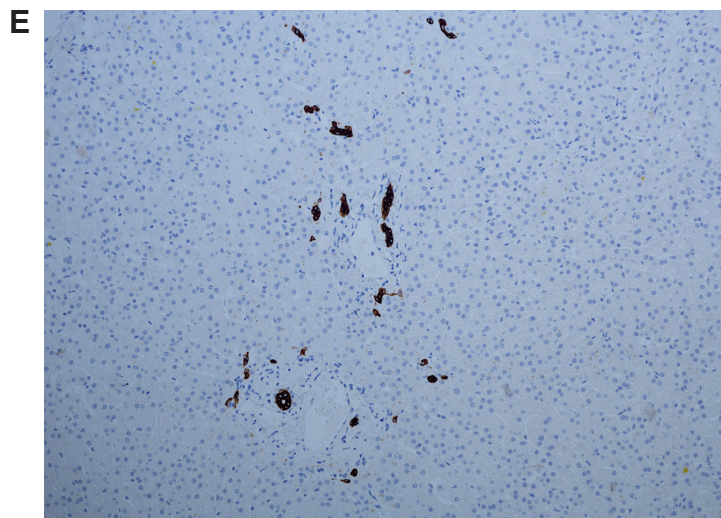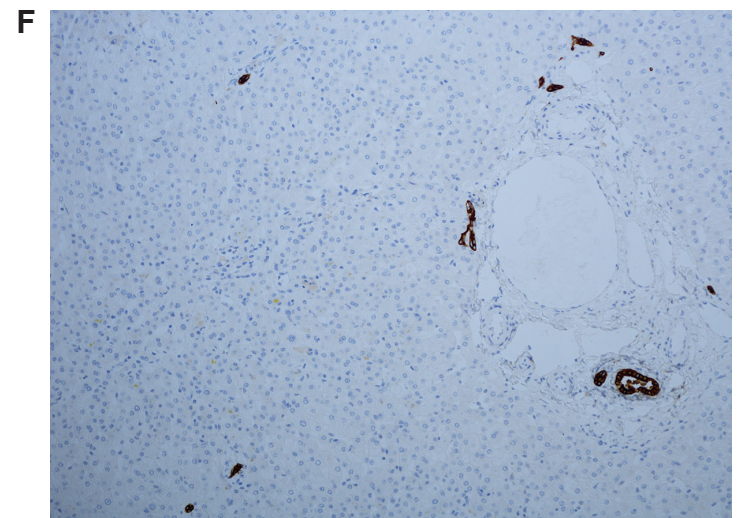



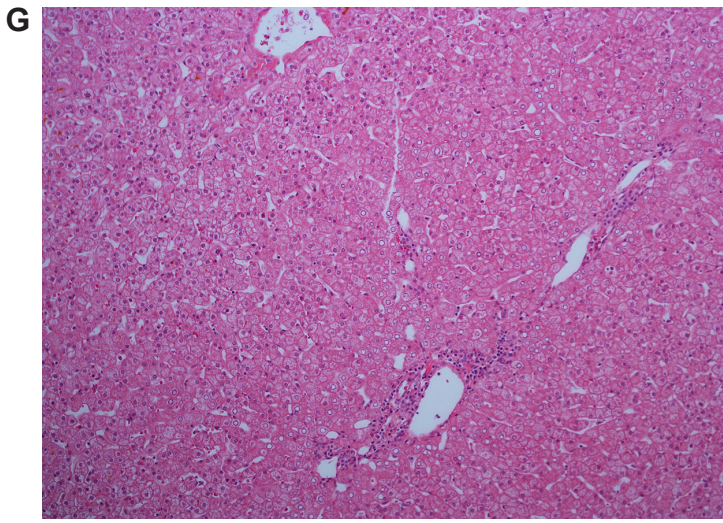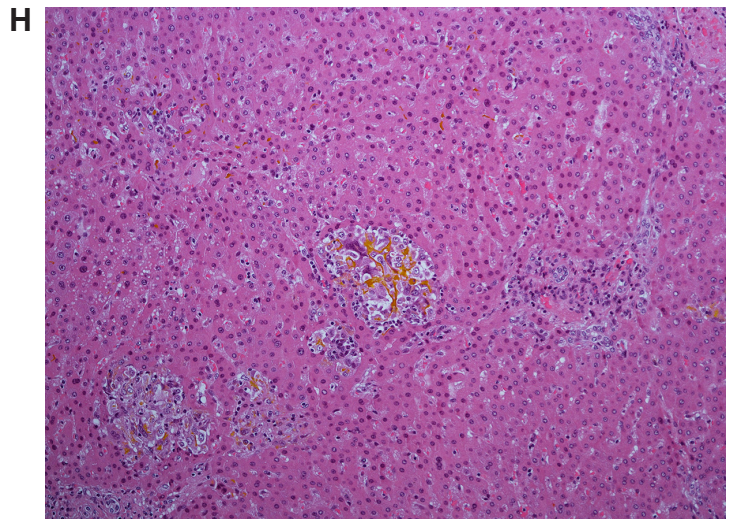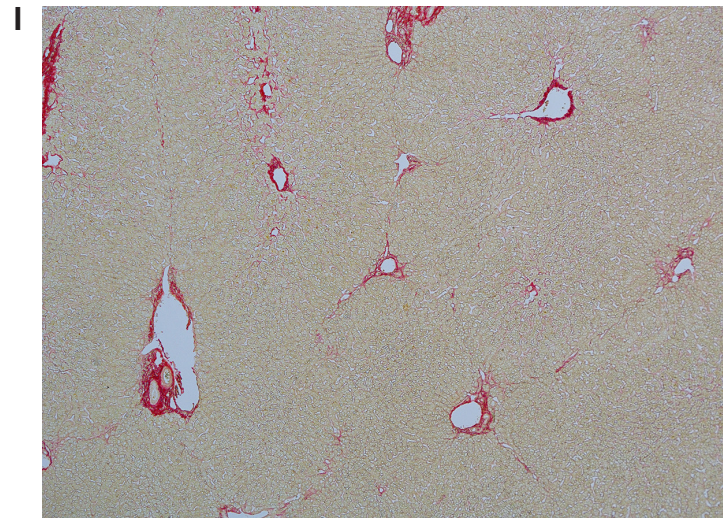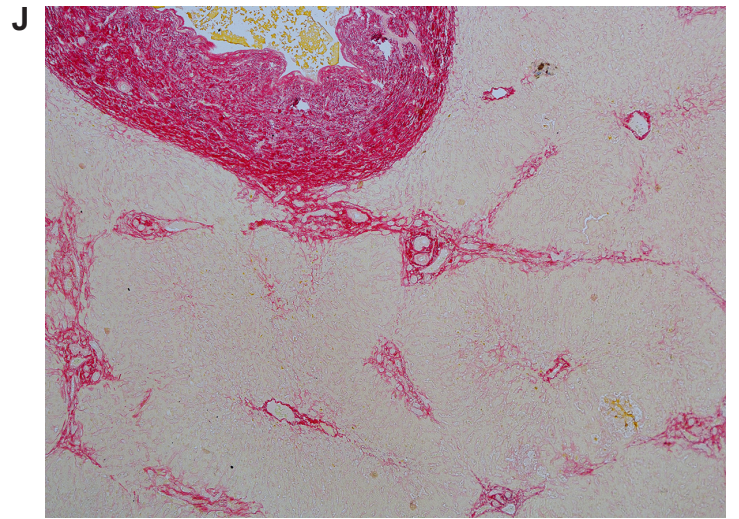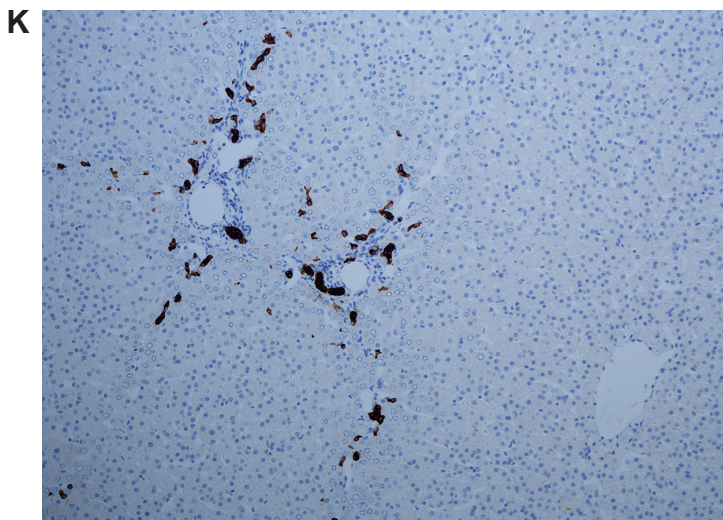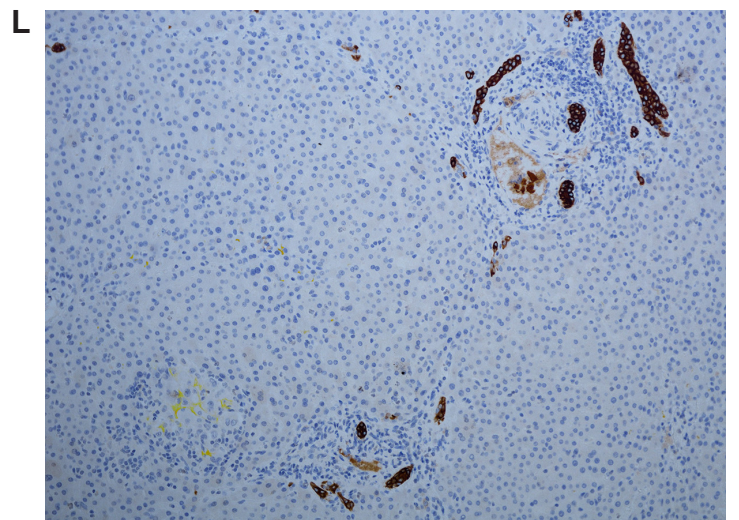

Supplement: AJT-16-1021-s001.pdf [file AJT-16-1021-s001.pdf]
